# Supplementary material for: Two MnII2LnIII4 (Ln = Gd, Eu) hexanuclear compounds of p-tert-butylsulfinylcalix[4]arene
Source: Royal Society of Chemistry journal article supplement (doi:10.1039/b817515b), 2009-01-01
Supplement: b817515b.pdf [file b817515b.pdf]

## Electronic Supplementary Information

### Two $\text{Mn}^{\text{II}}\text{Ln}^{\text{III}}_4$ (Ln = Gd, Eu) hexanuclear compounds of *p*-*tert*-butylsulfinylcalix[4]arene

Yanfeng Bi,<sup>a,c</sup> Xiu-Teng Wang,<sup>b</sup> Bing-Wu Wang,<sup>b</sup> Wuping Liao,<sup>\* a</sup> Xiaofei Wang,<sup>a,c</sup>

Hongjie Zhang,<sup>a</sup> Song Gao<sup>\* b</sup> and Deqian Li<sup>a</sup>

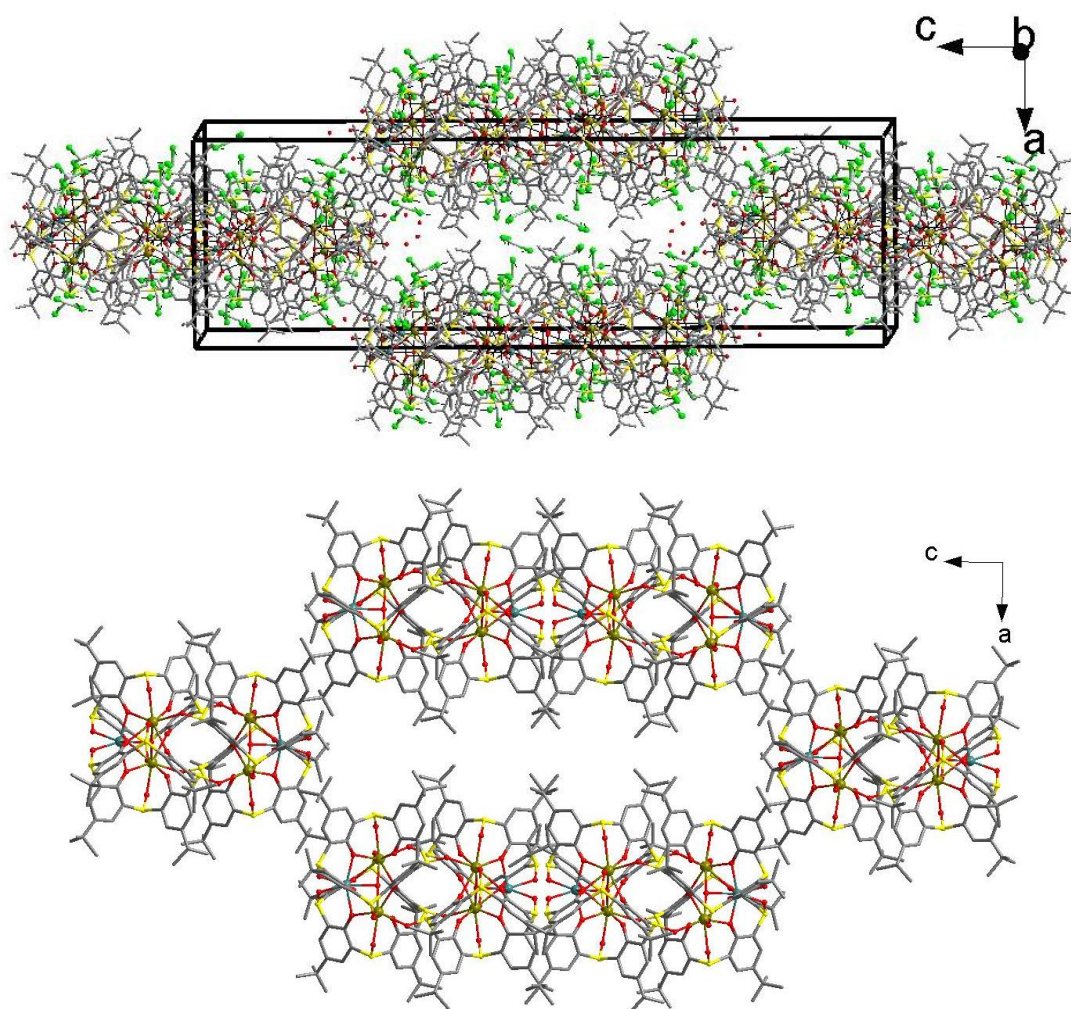

**Fig. S1** Views of the extended structure of **1** with (upper) and without the solvent molecules (bottom).

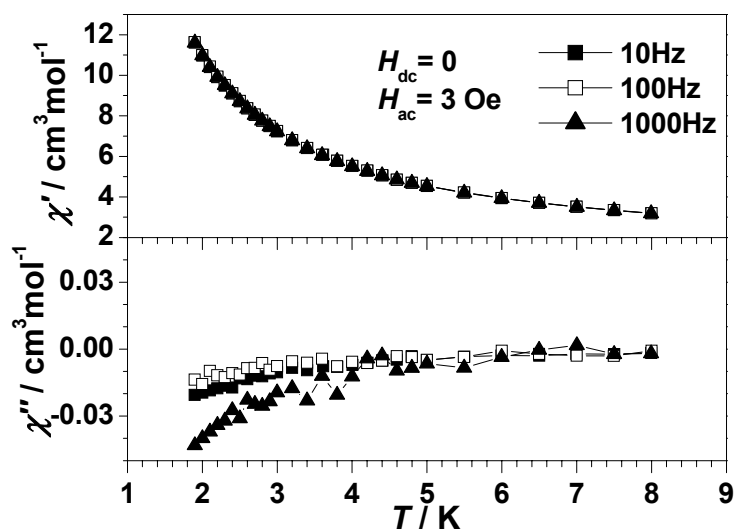

Fig. S2 ac susceptibility measurement for 1

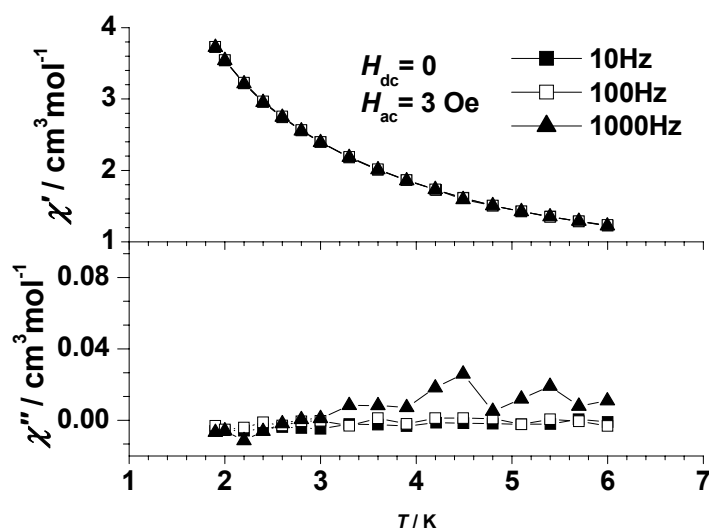

Fig. S3 ac susceptibility measurement for 2

**Table S1.** Selected bond distances (Å) and angles (°) for compounds **1** and **2** (based on squeezed data)

|                   | <b>1</b>   |                   | <b>2</b>   |
|-------------------|------------|-------------------|------------|
| Gd(1)–O(1)        | 2.454(2)   | Eu(1)–O(1)        | 2.461(2)   |
| Gd(1)–O(2)        | 2.317(2)   | Eu (1)–O(2)       | 2.326(2)   |
| Gd(1)–O(3)        | 2.348(2)   | Eu (1)–O(3)       | 2.362(2)   |
| Gd(1)–O(4)        | 2.402(2)   | Eu (1)–O(4)       | 2.407(2)   |
| Gd(1)–O(6)        | 2.351(2)   | Eu (1)–O(6)       | 2.361(2)   |
| Gd(1)–O(7)        | 2.388(2)   | Eu (1)–O(7)       | 2.393(2)   |
| Gd(1)–O(8)        | 2.343(2)   | Eu (1)–O(8)       | 2.354(2)   |
| Gd(1)–O(9)        | 2.3682(2)  | Eu (1)–O(9)       | 2.3767(2)  |
| Mn(1)–O(1)        | 2.210(2)   | Mn(1)–O(1)        | 2.208(2)   |
| Mn(1)–O(4)        | 2.219(2)   | Mn(1)–O(4)        | 2.215(2)   |
| Mn(1)–O(5)        | 2.096(5)   | Mn(1)–O(5)        | 2.109(5)   |
| Mn(1)–O(9)        | 2.234(3)   | Mn(1)–O(9)        | 2.227(3)   |
| Gd(1)–Mn(1)       | 3.3120(5)  | Eu(1)–Mn(1)       | 3.3130(5)  |
| Gd(1)–Gd(1)       | 4.7336(2)  | Eu(1)–Eu(1)       | 4.7506(3)  |
| Mn(1)–O(1)–Gd(1)  | 90.32(7)   | Mn(1)–O(1)–Eu(1)  | 90.22(7)   |
| Mn(1)–O(4)–Gd(1)  | 91.47(7)   | Mn(1)–O(4)–Eu(1)  | 91.47(7)   |
| Mn(1)–O(9)–Gd(1)  | 92.00(7)   | Mn(1)–O(9)–Eu(1)  | 91.98(7)   |
| Gd(1)–O(9)–Gd(1)  | 175.99(14) | Eu(1)–O(9)–Eu(1)  | 176.03(13) |
| Mn(1)–Gd(1)–Gd(1) | 44.389(2)  | Mn(1)–Eu(1)–Eu(1) | 44.195(3)  |
| Gd(1)–Mn(1)–Gd(1) | 91.220(16) | Eu(1)–Mn(1)–Eu(1) | 91.610(16) |

**Table S2** Crystallographic data for compounds **1** and **2** (non-squeezed)

|                              | <b>1</b>                                                | <b>2</b>                                                |
|------------------------------|---------------------------------------------------------|---------------------------------------------------------|
| CCDC- number                 | 683027                                                  | 683028                                                  |
| Formula                      | $C_{167.72}H_{200.28}C_{123.16}Gd_4Mn_2O_{40.28}S_{16}$ | $C_{167.55}H_{198.19}Cl_{22.65}Eu_4Mn_2O_{39.35}S_{16}$ |
| Formula wt.                  | 4933.50                                                 | 4875.35                                                 |
| Crystal system               | Tetragonal                                              | Tetragonal                                              |
| Space group                  | $I4_1/a$                                                | $I4_1/a$                                                |
| $T$ /K                       | 185(2)                                                  | 150(2)                                                  |
| $a$ /Å                       | 19.7575(6)                                              | 19.6997(8)                                              |
| $b$ /Å                       | 19.7575(6)                                              | 19.6997(8)                                              |
| $c$ /Å                       | 65.511(3)                                               | 65.255(4)                                               |
| $V$ (Å <sup>3</sup> )        | 25572.8(16)                                             | 25324(2)                                                |
| $Z$                          | 4                                                       | 4                                                       |
| $D_c$ /g cm <sup>-3</sup>    | 1.281                                                   | 1.279                                                   |
| $\mu$ /mm <sup>-1</sup>      | 1.546                                                   | 1.498                                                   |
| $F(000)$                     | 9938                                                    | 7864                                                    |
| Tot. Data                    | 124362                                                  | 256781                                                  |
| Uniq. Data                   | 14640                                                   | 15242                                                   |
| $\theta_{max}$               | 27.49                                                   | 28.00                                                   |
| $R_{int}$                    | 0.028                                                   | 0.055                                                   |
| $GOF$                        | 1.06                                                    | 1.028                                                   |
| $R_1^a$ [ $I > 2\sigma(I)$ ] | 0.0852                                                  | 0.0882                                                  |
| $wR_2^b$ (all data)          | 0.2676                                                  | 0.2913                                                  |

<sup>a</sup> $R_1 = \Sigma ||F_0| - |F_c|| / \Sigma |F_0|$ ; <sup>b</sup> $wR_2 = \Sigma [w(F_0^2 - F_c^2)^2] / \Sigma [w(F_0^2)^2]^{1/2}$
